# Supplementary material for: A network perspective of engaging patients in specialist and chronic illness care: The 2014 International Health Policy Survey
Source: PLoS One. 2018 Aug 13;13(8):e0201355. doi: 10.1371/journal.pone.0201355 (PMC6089423; doi:10.1371/journal.pone.0201355)
Supplement: S1 Appendix — (XLSX) [file pone.0201355.s001.xlsx]

## Sheet: Sheet 1
Variables	Patient engagement classification	Color labels for patient engagement measures	Short names used in Figures and Appendix 2	Proportions of ineligibility	Proporitons of missing data	Layers	Network numbers	Included for Bayesian network modeling	Reasons for exclusion	Original questions	Responses
q1425a2	Mixed	Purple	CC_DR_for_question	0.283666	0.0211908	2	17	TRUE		Q1425_A2. Between doctor visits, is there a health care professional You can easily contact to ask a question or get advice about your health condition(s)?	Yes; No
q1425a1	Patient as having critical self-knowledge	Green	CC_contacted	0.283666	0.00650215	2	17	TRUE		Q1425_A1. Between doctor visits, is there a health care professional Who contacts you to see how things are going?	Yes; No
q1065a3	Patient as having critical self-knowledge	Green	SP_What_matters	0.974461	0.000940071	2	7	TRUE		Q1065A3. When you have received care or treatment from specialists, how often did they Ask what matters to you. Would you say always, often, sometimes, rarely or never?	Always; Often; Sometimes; Rarely or never;Not applicable
q1423	Self care and autonomy	Orange	CC_Helpful_plan	0.574187	0.0165687	2	1	TRUE		Q1423. Has this plan helped you control or manage your _____? Would you say ...?	Not at all; Only a little; Some; A lot
q1065a4	Self care and autonomy	Orange	SP_Family_involved	0.855386	0.00458284	2		TRUE		Q1065A4. When you have received care or treatment from specialists, how often did they give your family and relatives the opportunity to be involved in your care as much as you wanted. Would you say always, often, sometimes, rarely or never?	Always; Often; Sometimes; Rarely or never
q1422	Shared decision-making	Red	CC_Feasible_plan	0.283666	0.0115942	2	1	TRUE		Q1422. Do you have a treatment plan for your _____ that you can carry out in your daily life?	Yes; No
q1065a2	Shared decision-making	Red	SP_Involvement	0.425695	0.0138269	2	7	TRUE		Q1065A2. When you have received care or treatment from specialists, how often did they Involve you as much as you want to be in decisions about your treatment or care. Would you say always, often, sometimes, rarely or never?	Always; Often; Sometimes; Rarely or never;Not applicable
q1065a1	Shared decision-making	Red	SP_Rx_choice	0.425695	0.0120642	2	7	TRUE		Q1065A1. When you have received care or treatment from specialists, how often did they Tell you about treatment choices. Would you say always, often, sometimes, rarely or never?	Always; Often; Sometimes; Rarely or never;Not applicable
q1420a3			CC_Instruction	0.283666	0.0128868	2	1	TRUE		Q1420A3. During the past year, when you received care, has any health care professional you see for your _____ - Given you clear instructions about symptoms to watch for and when to seek further care or treatment?	Yes; No
q1420a4			CC_Written_plan	0.283666	0.0124951	2	1	TRUE		Q1420A4. During the past year, when you received care, has any health care professional you see for your _____ - Given you a written plan to help you manage your own care? (IF NEEDED: By managing your own care, we mean knowing what...	Yes; No
q1480a2			Exercise	0	0.0048962	2	1	TRUE		Q1480A2. During the past 2 years, has any health professional talked with you about ...? - Exercise or physical activity	Yes; No; Have not seen a doctor in past 2 years
q1480a1			Healthy_diet	0	0.0052879	2	1	TRUE		Q1480A1. During the past 2 years, has any health professional talked with you about ...? - A healthy diet and healthy eating	Yes; No; Have not seen a doctor in past 2 years
q1415a5			Mental	0	0.00536624	2	1	TRUE		Q1415_A5. Have you ever been told by a doctor that you have Depression, anxiety or other mental health problems?	Yes; No
q1480a3			Stress_sources	0	0.00661966	2	1	TRUE		Q1480A3. During the past 2 years, has any health professional talked with you about ...? - Things in your life that worry you or cause stress	Yes; No; Have not seen a doctor in past 2 years
q600			Country	0	0	1	2	TRUE		Q600. COUNTRY CODE	Australia; Canada; France; Germany; Netherlands; New Zealand; Norway; Sweden; Switzerland; United Kingdom; United States
q810a4			Cost_no_dentist	0.793615	0.000391696	2	2	TRUE		Q810A4. During the past 12 months, was there a time when you Did not visit a dentist when you needed to because of the cost?	Yes; No
q915			Regular_Dr	0	0	2	2	TRUE		Q915. REGULAR DOCTOR OR PLACE	HAS REGULAR DOCTOR/GP/NP, PA; HAS REGULAR PLACE; NO REGULAR DOC/PLACE
q1415a9			Stroke	0.941246	3.91696e-05	2	2	TRUE		Q1415_A9. Have you ever been told by a doctor that you have Stroke?	Yes; No
q815			After-hour_clinics	0	0.0611829	2	3	TRUE		Q815. How easy or difficult is it to get medical care in the evenings, on weekends, or holidays without going to the hospital emergency department/Accident and Emergency (A and E) Department/emergency room. Is it ...?	Very easy; Somewhat easy; Somewhat difficult; Very difficult
q935			GP_Same-day	0.0249119	0.0254211	2	3	TRUE		Q935. When you call your regular doctor's office/usual place of care/regular GP's practice/your regular GP's surgery with a medical concern during regular practice hours, how often do you get an answer that same day?	Always; Often; Sometimes; Rarely or never
q1621			Rating	0	0.037172	2	3	TRUE		Q1621. Which of the following statements comes closest to expressing your overall view of the health care system in this country?
q820			Timely_appointment	0	0.0861731	2	3	TRUE		Q820. Last time you were sick or needed medical attention, how quickly could you get an appointment to see a doctor or a nurse? Please do not include a visit to the hospital emergency department/Accident and Emergency (A and E) Department/emergency room.	On the same day; The next day; In 2 to 5 days; In 6 to 7 days; In 8 to 14 days; After more than two weeks; Or were you never able to get an appointment
q940a3			GP_Encourage_asking	0.0249119	0.0308265	2	4	TRUE		Q940A3. When you need care or treatment, how often does your regular doctor or medical staff you see ...? Encourage you to ask questions Would you say it is ...?	Always; Often; Sometimes; Rarely or never
q940a2			GP_Enough_time	0.0249119	0.015472	2	4	TRUE		Q940A2. When you need care or treatment, how often does your regular doctor or medical staff you see ...? Spend enough time with you Would you say it is ...?	Always; Often; Sometimes; Rarely or never
q940a1			GP_Know_youy_info	0.0249119	0.0334117	2	4	TRUE		Q940A1. When you need care or treatment, how often does your regular doctor or medical staff you see ...? Know important information about your medical history Would you say it is ...?	Always; Often; Sometimes; Rarely or never
q940a4			GP_Understandable	0.0249119	0.0120642	2	4	TRUE		Q940A4. When you need care or treatment, how often does your regular doctor or medical staff you see ...? Explain things in a way that is easy to understand Would you say it is ...?	Always; Often; Sometimes; Rarely or never
q1005a2			Conflicting_info	0	0.0100274	2	5	TRUE		Q1005A2. And, was there EVER a time in the past 2 years when You received conflicting information from different doctors or health care professionals?	Yes, this happened; No
q1115			Mistake	0	0.00959655	2	5	TRUE		Q1115. In the past 2 years, was there ever a time you thought a medical mistake was made in your treatment or care? This could include being given the wrong medication or the wrong result from a medical test.	Yes; No
q1005a1			Result_NA	0	0.0228359	2	5	TRUE		Q1005A1. Now thinking about the past 2 years, when receiving care for a medical problem, was there EVER a time when Test results or medical records were not available at the time of your scheduled medical care appointment?	Yes, this happened; No
q1005a3			Unnecessary_tests	0	0.0097924	2	5	TRUE		Q1005A3. And, was there EVER a time in the past 2 years when Doctors ordered a medical test that you felt was unnecessary because the test had already been done?	Yes, this happened; No
q1325			Hos_GP_informed	0.769918	0.0151195	2	6	TRUE		Q1325. After you left the hospital, did the doctors or staff at the place where you usually get medical care seem informed and up-to-date about the care you received in the hospital?	Yes; No; I did not see a/my doctor/GP after leaving the hospital
q1310a4			Hos_Someone_asked	0.766001	0.00266353	2	6	TRUE		Q1310A4. When you left the hospital, did you know who to contact if you had a question about your condition or treatment?	Yes; No
q1050a2			SP_GP_not_informed	0.433764	0.0313749	2	6	TRUE		Q1050. In the past two years, was there a time A2. After you saw the specialist, that your regular doctor did not seem informed and up-to-date about the care you got from the specialist.	Yes; No
q1050a1			SP_No_info	0.433764	0.0242852	2	6	TRUE		Q1050. In the past two years, was there a time A1. When a specialist did not have basic medical information or test results from your regular doctor about the reason for your visit.	Yes; No
q1424			CC_Confidence	0.97168	0.00305523	2	7	TRUE		Q1424. How confident are you that you can control and manage your health problems?	Very confident; Confident; Not very confident; Not at all confident
q1402			ADL	0.388288	0.00258519	2	8	TRUE		Q1402. To what extent are you limited in the activities people usually do, such as feeding yourself, getting in and out of bed or a chair, dressing and undressing, or bathing? Would you say you are severely limited, somewhat limited, or not limited...	Severely limited; Somewhat limited, or; Not limited at all
q1405			Anyone_help	0.883	0.000470035	2	8	TRUE		Q1405. Does someone usually help you with any of the activities that you have difficulty doing?	Yes; No
q1407			Family_care	0.949785	0.000470035	2	8	TRUE		Q1407. Do you get unpaid help from members of your family or friends, or paid help?	Unpaid help from family or friends; Paid help (P.N. SHOW THE FOLLOWING ONLY FOR SWITZERLAND paid professional help such as Spitex); Both unpaid and paid help; No help
q1408			Paid_care	0.997689	0.000235018	2	8	TRUE		Q1408. Do you or your family pay for this help or is it publicly-funded help such as home care services?	Funded privately (by you or your family); Publicly funded help such as home care services; both privately and publicly funded
q1415a4			Asthma	0	0.00434783	2	9	TRUE		Q1415_A4. Have you ever been told by a doctor that you have Asthma, chronic lung disease such as chronic bronchitis, emphysema or COPD?	Yes; No
q1428			CC_ER_use	0.488092	0.00211516	2	9	TRUE		Q1428. In the past year, have you stayed overnight in a hospital or visited the emergency department/Accident and Emergency (A and E) Department/emergency room because of your _____?	Yes, Emergency Room or Emergency Department; Yes, hospital; Yes, both; No
q1415a3			Diabetes	0	0.00446533	2	9	TRUE		Q1415_A3. Have you ever been told by a doctor that you have Diabetes?	Yes; No
q1415a1			Hypeprtension	0	0.00536624	2	9	TRUE		Q1415_A1. Have you ever been told by a doctor that you have Hypertension or high blood pressure?	Yes; No
q810a3			Cost_no_Rx	0	0.00172346	2	10	TRUE		Q810A3. During the past 12 months, was there a time when you Skipped a medical test, treatment, or follow-up that was recommended by a doctor because of the cost?	Yes; No
q810a2			Cost_no_visit	0	0.00101841	2	10	TRUE		Q810A2. During the past 12 months, was there a time when you Had a medical problem but did not visit a doctor because of the cost?	Yes; No
q810a1			Cost_not_fill	0	0.00113592	2	10	TRUE		Q810A1. During the past 12 months, was there a time when you Did not fill a prescription for medicine, or you skipped doses of your medicine because of the cost?	Yes; No
q1110a2			Explain_Rx	0.410067	0.0114375	2	11	TRUE		Q1110. In the past 12 months, has a health care professional...? A2. Explained the potential side effects of any medication that was prescribed	Yes; No
q1110a3			List_Rx	0.410067	0.00830396	2	11	TRUE		Q1110. In the past 12 months, has a health care professional...? A3. Given you a written list of all your prescribed medications	Yes; No
q1110a1			Review_Rx	0.410067	0.00622797	2	11	TRUE		Q1110. In the past 12 months, has a health care professional...? A1. Reviewed with you all the medications you take	Yes; No
q1310a2			Hos_FU_made	0.766001	0.00293772	2	12	TRUE		Q1310A2. When you left the hospital, did the hospital make arrangements or make sure you had follow-up care with a doctor or other health care professional?	Yes; No; Not applicable – did not need follow up care
q1310a3			Hos_Rx_explained	0.766001	0.00661966	2	12	TRUE		Q1310A3. When you left the hospital, did someone discuss with you the purpose of taking each of your medications?	Yes; No; Not taking any medications
q1310a1			Hos_Written_info	0.766001	0.00520956	2	12	TRUE		Q1310A1. When you left the hospital, did you receive written information on what to do when you returned home and what symptoms to watch for?	Yes; No
q1335			ER_GP_conditions	0.702859	0.0125734	2	13	TRUE		Q1335. The last time you went to the hospital emergency department/Accident and Emergency (A and E) Department/emergency room was it for a condition that you thought could have been treated by the doctors or staff at the place where you usually get medical	Yes; No
q1401			Health	0	0.00364277	2	13	TRUE		Q1401. In general, how would you describe your own health?	Excellent; Very good; Good; Fair; Poor
q1330			Num_ER_use	0	0.0182922	2	13	TRUE		Q1330. How many times have you used a hospital emergency department/Accident and Emergency (A and E) Department/emergency room for your own medical care in the past 2 years?
q1496			EOL_doc	0	0.0173521	2	14	TRUE		Q1496. Do you have a written plan or document describing the health care treatment you want or do not want at the end of your life?	Yes, have a written plan; No
q1495			EOL_family	0	0.0121426	2	14	TRUE		Q1495. In the event you become very ill or injured and you cannot make decisions for yourself, have you had a discussion with family, a ...	Yes; No
q1497			EOL_surrogate	0	0.0174305	2	14	TRUE		Q1497. Do you have a written document that names someone to make treatment decisions for you if you cannot make decisions for yourself?	Yes; No
q1315			Hos_Readmit	0.978261	0.000117509	2	15	TRUE		Q1315. After you were discharged, were you readmitted to a hospital or did you have to go to an emergency department within a month as a result of complications that occurred during your recovery?	Yes, readmitted to a hospital; Yes, had to go to the ER/ED/AED; Yes, both; No; Had no complications
q1135			Uncertain_dose	0.938895	0.000195848	2	15	TRUE		Q1135. In the past 12 months, have you ever been unsure about when you should take a drug or how much to take?	Yes; No
q1415a6			Cancer	0	0.00434783	2	16	TRUE		Q1415_A6. Have you ever been told by a doctor that you have Cancer?	Yes; No
q1415a8			Joint_pain	0	0.00630631	2	16	TRUE		Q1415_A8. Have you ever been told by a doctor that you have Joint pain or arthritis?	Yes; No
q1485			Dr_quit	0.867842	0.00133177	2	18	TRUE		Q1485. During the past 2 years, has any health professional talked with you about the health risks of smoking or using tobacco and ways to quit?	Yes; No; Have not seen a doctor in past 2 years
q1483			Smoking	0	0.00156678	2	18	TRUE		Q1483. Do you smoke cigarettes or use tobacco?	Yes; No
q1492			Family_care	0.799804	0.000940071	2	19	TRUE		Q1492. Is this person or are these persons members of your family or someone else?	Members of your family; Someone else (not members of your family); Both
q1494			Time_for_care	0.799804	0.00791226	2	19	TRUE		Q1494. For how many hours per week do you provide care or assistance?	less than 10 hours per week; At least 10 but less than 20 hours per week; 20 hours per week or more
college			College_edu		0.0191539	1		TRUE			Yes, some college education; no
q725			Sex	0	0	1		TRUE	Redudant variables or variables for interview processing	Q725. RESPONDENT SEX	Male; female
q1418			CC_Dx_management	0.977595	3.91696e-05	2		TRUE		Q1418. Are you enrolled in a disease management program for diabetes, high blood pressure, heart disease, chronic lung problems?	Yes; No
q1420a1			CC_Goal_discussed	0.283666	0.0163337	2		TRUE		Q1420A1. During the past year, when you received care, has any health care professional you see for your _____ - Discussed with you your main goals or priorities in caring for this condition?	Yes; No
q1410			Cost_no_care	0.949785	0.000470035	2		TRUE		Q1410. In the past year, was there a time you did NOT receive the help you needed because of the cost?	Yes; No
q1498			EOL_insured	0.941246	0.00191931	2		TRUE		Q1498. Are you insured to support the loss of autonomy ?	Yes, you are sure about it; You are sure you are not
q1060			GP_Care_coordination	0.0249119	0.0392088	2		TRUE		Q1060. How often does your regular doctor or someone in your doctor's practice help coordinate or arrange the care you receive from other doctors and places? Coordination could include helping you get appointments, following-up to make sure you get...	Always; Often; Sometimes; Rarely or never; Never see other doctors/place or needed coordination
q1415a2			Heart Dx	0	0.00638465	2		TRUE		Q1415_A2. Have you ever been told by a doctor that you have Heart disease, including heart attack?	Yes; No
q1300			Hosp_admi	0	0.00285938	2		TRUE		READ TO ALL: For the next few questions we will be asking about your health care experiences in the past 2 years. Q1300. Have you been admitted to the hospital overnight in the past 2 years?	Yes; No
q2070			Income	0	0.102233	2		TRUE		Q2070. The average household income of families in this country is around ______ a year (month for Switzerland). By comparison, is your household income...?	Much above average; Somewhat above average; Average; Somewhat below average; Much below average
q1070			Num_Dr	0	0.0112025	2		TRUE		Q1070. Not counting any time you may have been hospitalized, how many different doctors have you seen in the past 12 months?
q1105			Num_Rx	0	0.0104975	2		TRUE		Q1105. How many different prescription medications are you taking on a regular or ongoing basis?
q1490			Provide_care	0	0.00376028	2		TRUE		Q1490. Do you provide care or assistance at least once a week to one or more persons living with some age-related problem, ...	Yes; No
q1020			Specialist_care	0	0.00411281	2		TRUE		Q1020. Have you seen or needed to see any specialist doctors (or consultants) in the past 2 years? By 'specialist' we mean doctors that specialize in one area of health care like surgery, heart, allergy or mental health.	Yes; No
q1030days				0	0	2		TRUE		Q1030days
q1605_usd				0	0.300235	2		TRUE
q2005				0.749941	0.00188014	2		TRUE		Q2005. Including you, how many adults, age 55 or older, live in your household?
q615				0.57125	0	1			Country-specific variables	Q615. COMMUNITY TYPE
q630				0	0	1			Country-specific variables	Q630. REGION
q640				0.929025	0	1			Country-specific variables	Q640. LINGUISTIC REGIONS
q715				0	0	1			Redudant variables or variables for interview processing	Q715. [P.N. - HIDDEN COMPUTE FOR AGE.]
q726				0.929025	0	1			Country-specific variables	Q726. RESPONDENT LANGUAGE
q1420vrbh			Chronic_conditions	0.283666	0	2			Redudant variables or variables for interview processing	Q1420	diabetes; high blood pressure; heart disease; chronic lung problems; depression, anxiety, or another mental health problem; cancer; joint pain or arthritis
q1620			OOP_spending	0.699765	0.0882883	2			Harmonization not feasible	Q1620. If you can't recall exactly how much you and your family spent out-of-pocket for medical treatments or services, please provide your best estimate. Was it ...?	Categories varied according countries
q1045				0.977399	0.00814728	2			Redudant variables or variables for interview processing	Q1045. Was it ...? (IF NECESSARY: After you were advised to see or decided to see a specialist, how long did you have to wait for an appointment?)	Less than four weeks; Four to eight weeks; More than eight weeks
q1415a10				0.929025	3.91696e-05	2			Country-specific variables	Q1415_A10. Have you ever been told by a doctor that you have Neurological problems like dementia/Alzheimer's disease?
q1494can1				0.962906	0.000313357	2			Country-specific variables	Q1494Can-1. During the past year, was there a time that you felt you needed help to provide this care but didn't receive it?	Yes; No
q1494can2_1				0.793615	0	2			Country-specific variables	Q1494Can-2. Thinking of the most recent time you felt you needed help to provide this care but didn't receive it, was it because?	Services were not available in your area
q1494can2_2				0.793615	0	2			Country-specific variables	Q1494Can-2. Thinking of the most recent time you felt you needed help to provide this care but didn't receive it, was it because?	Waiting times were too long
q1494can2_3				0.793615	0	2			Country-specific variables	Q1494Can-2. Thinking of the most recent time you felt you needed help to provide this care but didn't receive it, was it because?	Cost was too expensive
q1494can2_4				0.793615	0	2			Country-specific variables	Q1494Can-2. Thinking of the most recent time you felt you needed help to provide this care but didn't receive it, was it because?	You did not know where to go
q1494can2_5				0.793615	0	2			Country-specific variables	Q1494Can-2. Thinking of the most recent time you felt you needed help to provide this care but didn't receive it, was it because?
q1494can2_7				0.793615	0	2			Country-specific variables	Q1494Can-2. Thinking of the most recent time you felt you needed help to provide this care but didn't receive it, was it because?
q1494can3				0.962906	0.000195848	2			Country-specific variables	Q1494Can-3. Have you felt distress, anger or experienced depression while providing care or assistance for a family member or friend?	Yes; No
q1499				0.929025	0.00144928	2			Country-specific variables	Q1499. Are you a member of a self-determined living and dying organization such as Exit, Dignitas?
q1505				0.764238	0.00164512	2			Country-specific variables	Q1505. In addition to government funded health services, are you currently covered by any private health insurance that you or your family pays for or that an employer or association provides?	Yes, have private insurance; No, do not have private insurance
q1506				0.870349	0.0045045	2			Country-specific variables	Q1506. Do you have private health insurance?	Hospital only; Ancillary only (“extras”); Hospital and ancillary (“extras”); No
q1510				0.941246	0.000509205	2			Country-specific variables	Q1510. Are you currently covered by the CMU-C (CMU-C Supplementary Health insurance Coverage)?	Oui; Non
q1511				0.941246	0.000274187	2			Country-specific variables	Q1511. Do you benefit from a supplementary health coverage, that is from a mutual insurance company, from a private supplementary health insurance or coming from an institution of foresight, which pays off care besides the Social Security?	Oui; Non
q1512a1				0.941246	0.000548374	2			Country-specific variables	Q1512A1. Are you fully covered by the social security? A1. For a long-term condition?	Oui; Non
q1512a2				0.941246	0.000587544	2			Country-specific variables	Q1512A2. Are you fully covered by the social security? A2. For another reason (disability, pregnancy (maternity), occupational accident, handicap...)?	Oui; Non
q1515				0.963651	3.91696e-05	2			Country-specific variables	Q1515. What kind of health insurance do you have?
q1520				0.921661	0.00188014	2			Country-specific variables	Q1520. In addition to the National Health Service, are you currently covered by private health insurance that you or your family pays for or that an employer or association provides?
q1525				0.96083	0.000705053	2			Country-specific variables	Q1525. In addition to the 'basic insurance,' are you currently covered by an additional health care insurance package that you or your family pays for or that an employer or association provides?	Yes, have private insurance; No, do not have private insurance
q1527				0.96083	0.0052879	2			Country-specific variables	Q1527. What is the amount of annual excess that you have to pay yourself?	€0; €100; €200; €300; €400; €500
q1530				0.929025	0.0027027	2			Country-specific variables	Q1530. What type of personal health insurance (compulsory basic insurance) do you have?	General health insurance with deductible; Bonus insurance; HMO insurance; Family GP model; Insurance model with telephone consultation prior to every visit to the doctor’s (telephone model)
q1533				0.929025	0.00121426	2			Country-specific variables	Q1533. In addition to your compulsory basic insurance, are you currently covered by an additional health care insurance package that you, your family, an employer or an association pays for?	Yes; No
q1535				0.929025	0.00654132	2			Country-specific variables	Q1535. What is the amount of your annual excess that you have to pay yourself?	CHF 300; 500; 1000; 1500; 2000; 2500
q1537				0.929025	0.00595378	2			Country-specific variables	Q1537. In the past 3 years, have your medical bills (for basic health insurance) been higher than the amount of your annual excess that you have to pay yourself?	Not at all; One time; 2 or more times
q1546a1				0.931257	0.000430866	2			Country-specific variables	Q1546A1. Please tell me whether you are currently covered by Health insurance through your or someone else's employer or union or not.	Covered; Not covered
q1546a2				0.931257	0.000548374	2			Country-specific variables	Q1546A2. Please tell me whether you are currently covered by Medicare, a government plan that pays health care bills for people aged 65 or older and for some disabled people or not.	Covered; Not covered
q1546a3				0.931257	0.00101841	2			Country-specific variables	Q1546A3. Please tell me whether you are currently covered by Medicaid or any other state medical assistance plan for those with lower incomes or not.	Covered; Not covered
q1546a4				0.993733	0.000235018	2			Country-specific variables	Q1546A4. Please tell me whether you are currently covered by Health insurance plan that you bought on your own or not.	Covered; Not covered
q1546a5				0.996396	0.000195848	2			Country-specific variables	Q1546A5. Please tell me whether you are currently covered by Health insurance from some other source or not.	Covered; Not covered
q1550				0.93396	3.91696e-05	2			Country-specific variables	Q1550. In the past year, was there ever a time when you did NOT have any health insurance?	Yes; No
q1553				0.93396	0.0121034	2			Country-specific variables	Q1553. A deductible is the amount you have to pay before your insurance plan will start paying any part of your medical bills. What is your annual deductible per person?	No deductible; Less than $500; $500 to under $1000; $1,000 to under $2,000; $2,000 or more per person
q1560				0.717744	0.00748139	2			Country-specific variables	Q1560. Do you have a private health care insurance either paid by yourself, your household, by your employer, or by a union?	Yes; No
q1565				0	0.00411281	2			Country-specific variables	Q1565. In the past 12 months, did you have problems paying or were unable to pay any medical bills?	Yes; No
q1605				0	0.300235	2			Redudant variables or variables for interview processing	Q1605. In the past 12 months, about how much have you and your family spent out-of-pocket for medical treatments or services that were not covered by insurance/public or private insurance/private health insurance or the public health care system/Medicare o
q2015				0.870349	0.00509205	2			Country-specific variables	Q2015. What is the highest level of education you have completed to date?	Categories varied according countries
q2020				0.793615	0.00419115	2			Country-specific variables	Q2020. What is the highest level of education you have completed to date?	Categories varied according countries
q2025				0.970623	0.00101841	2			Country-specific variables	Q2025. What is your highest level of education you have completed to date?	Categories varied according countries
q2030				0.96083	0.00242852	2			Country-specific variables	Q2030. What is the highest level of formal education you have completed to date?	Categories varied according countries
q2035				0.931257	0.000313357	2			Country-specific variables	Q2035. What is the highest level of education you have completed to date?	Categories varied according countries
q2040				0.963651	0.000744222	2			Country-specific variables	Q2040. What is the highest level of education you have completed to date?	Categories varied according countries
q2045				0.96083	0.000313357	2			Country-specific variables	Q2045. What is the highest level of education that you have finished?	Categories varied according countries
q2050				0.941246	0.00105758	2			Country-specific variables	Q2050. What is the highest level of education you have completed to date?	Categories varied according countries
q2055				0.96083	0.000352526	2			Country-specific variables	Q2055. What is the highest level of education you have completed to date?	Categories varied according countries
q2060				0.717744	0.00274187	2			Country-specific variables	Q2060. What is the highest level of education you have completed to date?	Categories varied according countries
q2065				0.929025	0.000900901	2			Country-specific variables	Q2065. What is the highest level of education you have completed to date?	Categories varied according countries
q2075				0.102233	0.0941637	2			Country-specific variables	Q2075. Now, just stop me when I get to the right category. Was your household income ...?	Categories varied according countries
q2080				0	0.00415198	2			Country-specific variables	Q2080. We are nearly finished. The next series of questions is for classification purposes only. Were you born in _____ or somewhere else?	Yes, born in this country; No, not born in this country
q2085				0.971132	0.000391696	2			Country-specific variables	Q2085. At what age did you enter Canada?
q2100				0.963651	7.83392e-05	2			Country-specific variables	Q2100. Were your parents born in Germany or somewhere else?	Categories varied according countries
q2105				0.941246	0.000117509	2			Country-specific variables	Q2105. Were your parents born in France or somewhere else?	Categories varied according countries
q2110				0.96083	7.83392e-05	2			Country-specific variables	Q2110. To which ethnic group do you belong?	Categories varied according countries
q2115				0.929025	0.000195848	2			Country-specific variables	Q2115. Were your parents born in Switzerland or somewhere else?	Categories varied according countries
q2120				0.793615	0.00121426	2			Country-specific variables	Q2120. Do you speak French/English well enough to conduct a conversation?	Categories varied according countries
q2123_01				0.970623	0	2			Country-specific variables	Q2123. To which ethnic group do you belong?	Categories varied according countries
q2123_02				0.970623	0	2			Country-specific variables	Q2123. To which ethnic group do you belong?	Categories varied according countries
q2123_03				0.970623	0	2			Country-specific variables	Q2123. To which ethnic group do you belong?	Categories varied according countries
q2123_04				0.970623	0	2			Country-specific variables	Q2123. To which ethnic group do you belong?	Categories varied according countries
q2123_05				0.970623	0	2			Country-specific variables	Q2123. To which ethnic group do you belong?	Categories varied according countries
q2123_06				0.970623	0	2			Country-specific variables	Q2123. To which ethnic group do you belong?	Categories varied according countries
q2123_07				0.970623	0	2			Country-specific variables	Q2123. To which ethnic group do you belong?	Categories varied according countries
q2123_08				0.970623	0	2			Country-specific variables	Q2123. To which ethnic group do you belong?	Categories varied according countries
q2123_09				0.970623	0	2			Country-specific variables	Q2123. To which ethnic group do you belong?	Categories varied according countries
q2123_10				0.970623	0	2			Country-specific variables	Q2123. To which ethnic group do you belong?	Categories varied according countries
q2123_11				0.970623	0	2			Country-specific variables	Q2123. To which ethnic group do you belong?	Categories varied according countries
q2125				0.96083	0.00168429	2			Country-specific variables	Q2125. To which of the following groups do you consider you belong?	Categories varied according countries
q2128				0.870349	0.00148844	2			Country-specific variables	Q2128. Are you of Aboriginal origin, Torres Strait Islander origin, or both?	Categories varied according countries
q2130				0.931257	0.000587544	2			Country-specific variables	Q2130. Are you of Latino or Hispanic origin or descent, such as Mexican, Puerto Rican, Cuban, or some other Latin American background?	Categories varied according countries
q2135				0.931257	0.0012926	2			Country-specific variables	Q2135. Do you consider yourself ...?	Categories varied according countries
q2150				0.603055	0.00144928	2			Country-specific variables	Q2150. Which of the following describes where you live?	Categories varied according countries
q2155				0.963651	3.91696e-05	2			Country-specific variables	Q2155. Do you speak a language other than German at home?	Categories varied according countries
q2160				0.941246	3.91696e-05	2			Country-specific variables	Q2160. Do you speak a language other than French at home?	Categories varied according countries
q2170				0	0.0116334	2			Country-specific variables	Q2170. Are you now employed full-time, part-time, retired or are you not employed for pay?	Categories varied according countries
q601				0.870349	0	2			Country-specific variables	Q.601 NEW SOUTH WALES SAMPLE
q625				0.931257	0	2			Country-specific variables	Q625. AREA TYPE
q645				0.96083	0	2			Country-specific variables	Q645. PRELOAD
q650				0	0	2			Country-specific variables	Q650. CELL/LANDLINE
q660				0	0	2			Country-specific variables	Q660. Postal code from sample file
q720				0	0	2			Redudant variables or variables for interview processing	Q720. AGE CATEGORIES	55-64; 65-74; 75+
q740				0	0	2			Redudant variables or variables for interview processing	Q740. QUOTA SET - BEHIND THE SCENES
q742				0.831179	0	2			Redudant variables or variables for interview processing	Q742. QUOTA SET - BEHIND THE SCENES UK & AUSTRALIA
q743				0.870349	0	2			Redudant variables or variables for interview processing	Q743. QUOTA SET - BEHIND THE SCENES - AUSTRALIA (MAJOR CITY/NOT MAJOR CITY)
q750				0	0	2			Redudant variables or variables for interview processing	Q750. QUOTA SET - BEHIND THE SCENES - CANADA PROVINCES
q905				0	0.0030944	2			Redudant variables or variables for interview processing	Q905. Is there one doctor you usually go to for your medical care?	Yes, have a regular doctor/GP; Yes, but have more than one regular doctor/GP; No; US ONLY (Q600=11) “Yes, have nursepractitioner or physician assistant”; CAN ONLY “Yes, have nurseor physician assistant
q910				0.86177	0.00168429	2			Redudant variables or variables for interview processing	Q910. Is there one doctor's group, health center, GP practice/general practice or clinic you usually go to for most of your medical care?	Yes; No
q940a5				0.931101	0.00109675	2			Country-specific variables	Q940A5. When you need care or treatment, how often does your regular doctor or medical staff you se ...? Inform you about pros and cons of a treatment. Would you say it is ...?
q940a6				0.931101	0.00176263	2			Country-specific variables	Q940A6. When you need care or treatment, how often does your regular doctor or medical staff you se ...? Show alternatives. Would you say it is ...?
q940can1				0.797101	0.000235018	2			Country-specific variables	Q940Can-1. In the last two years, have you emailed your regular doctor/the place you usually go for medical care with a medical question?	Yes; No
q940can2				0.797101	0.00575793	2			Country-specific variables	Q940Can-2. Would you like to be able to communicate with your regular doctor/the place you usually go for medical care by email?	Yes; No
a1				0.934234	0				Derived variables without documentation or base variables for question handling only	A1. And is this adult between 18 and 54 years old or over 54 years old?
a2				0.934234	0				Derived variables without documentation or base variables for question handling only	A2. May I please speak with the adult age 55 or older living in this household?
accprob				0	0.00364277				Derived variables without documentation or base variables for question handling only	accprob
age65				0	0				Derived variables without documentation or base variables for question handling only	age65
anychronic				0	0.00160595				Derived variables without documentation or base variables for question handling only	anychronic
anychronicfrance				0.941246	0				Derived variables without documentation or base variables for question handling only
anychronicswitzerland				0.929025	3.91696e-05				Derived variables without documentation or base variables for question handling only	anychronicswitzerland
askquest				0.0249119	0.0793968				Derived variables without documentation or base variables for question handling only	askquest
b1				0.89436	3.91696e-05				Derived variables without documentation or base variables for question handling only	B1. And how many of these adults are age 55 or older?
b2				0.978848	0				Derived variables without documentation or base variables for question handling only	B2. May I please speak with the person living in this household who is age 55 or older?
b3a				0.918762	0				Derived variables without documentation or base variables for question handling only	B3a. May I please speak with the younger/older of the two adults age 55 or older?
b3b				0.996749	0				Derived variables without documentation or base variables for question handling only	B3b. May I please speak with the person living in this household who is age 55 years old or older who celebrated a birthday last/will celebrate a birthday next ?
call				0.0249119	0.0254211				Derived variables without documentation or base variables for question handling only	call
call2				0.141363	0.0254211				Derived variables without documentation or base variables for question handling only	call2
caremng				0.283666	0.00317274				Derived variables without documentation or base variables for question handling only	caremng
case_id				0	0				Derived variables without documentation or base variables for question handling only
choices				0.425695	0.0552291				Derived variables without documentation or base variables for question handling only	choices
chrnct				0	0.00160595				Derived variables without documentation or base variables for question handling only	chrnct
chrnctfrance				0.941246	0				Derived variables without documentation or base variables for question handling only	chrnctfrance
chrnctswitzerland				0.929025	3.91696e-05				Derived variables without documentation or base variables for question handling only	chrnctswitzerland
chrnhosp				0.488092	0.00211516				Derived variables without documentation or base variables for question handling only	chrnhosp
coordinate				0.0249119	0.0392088				Derived variables without documentation or base variables for question handling only	coordinate
coordinate2				0.222993	0.0392088				Derived variables without documentation or base variables for question handling only	coordinate2
coordprob				0	0.0239326				Derived variables without documentation or base variables for question handling only	coordprob
coordprob2				0	0.0274579				Derived variables without documentation or base variables for question handling only	coordprob2
cp_1				0.820917	0				Derived variables without documentation or base variables for question handling only	CP-1. And so that I can ask you the right questions, could you please tell me if you are under 18, between the ages of 18 and 54 or over 54 years of age?)
cp_2				0.820917	0				Derived variables without documentation or base variables for question handling only	CP_2. Before we continue, are you driving (OPTIONAL: and unable to complete the survey)?
cp1				0.820917	0.00376028				Derived variables without documentation or base variables for question handling only	CP1. Now thinking about your telephone use, is there at least one telephone INSIDE your home that is currently working and is not a cell phone?
d_nz				0.970623	0				Derived variables without documentation or base variables for question handling only	D-NZ. In which region are you living ?
d_nzu				0.970623	0				Derived variables without documentation or base variables for question handling only	D-NZU. Would you say your living area is ... ?
d_uk				0.96083	0				Derived variables without documentation or base variables for question handling only	D-UK. In which region are you living ?
density				0.931257	0.00340776				Derived variables without documentation or base variables for question handling only
dischrg				0.766001	0.000117509				Derived variables without documentation or base variables for question handling only	dischrg
docplace				0	0				Derived variables without documentation or base variables for question handling only	docplace
dz1a				0	0.000195848				Derived variables without documentation or base variables for question handling only	D-Z1a. What state do you live in?
dz3				0	0				Derived variables without documentation or base variables for question handling only	D-Z3. What province is this household located in?
dz3a				0.793615	0				Derived variables without documentation or base variables for question handling only	D-Z3A. What province is this household located in?
easyafthrs				0	0.0611829				Derived variables without documentation or base variables for question handling only	easyafthrs
easyafthrs2				0.247317	0.0611829				Derived variables without documentation or base variables for question handling only	easyafthrs2
education				0.931257	0.000313357				Derived variables without documentation or base variables for question handling only	education
enlang				0	0				Derived variables without documentation or base variables for question handling only	endlang
ernum				0	0.0182922				Derived variables without documentation or base variables for question handling only	ernum
eruse				0	0.0182922				Derived variables without documentation or base variables for question handling only	eruse
eryes				0	0.0182922				Derived variables without documentation or base variables for question handling only	eryes
ethnicityrace				0.931257	0				Derived variables without documentation or base variables for question handling only	ethnicityrace
explain				0.0249119	0.031414				Derived variables without documentation or base variables for question handling only	explain
fsa				0	0				Derived variables without documentation or base variables for question handling only	Q655. Postal code from sample file
gender				0	0				Derived variables without documentation or base variables for question handling only	gender
getappt				0	0.0861731				Derived variables without documentation or base variables for question handling only	getappt
health				0	0.00364277				Derived variables without documentation or base variables for question handling only	health
hh1				0.828594	0.000156678				Derived variables without documentation or base variables for question handling only	HH1. Just so we select the right person, can you please tell me, including yourself, how many adults 18 or older are there living in your household?
ihp				0	0				Redudant variables or variables for interview processing
income				0	0.102233				Derived variables without documentation or base variables for question handling only	income
insr_nonus				0.0687427	0.0177438				Derived variables without documentation or base variables for question handling only	insr_nonus
insrcont				0.931257	3.91696e-05				Derived variables without documentation or base variables for question handling only	insrcont
insrcont2				0.931257	3.91696e-05				Derived variables without documentation or base variables for question handling only	insrcont2
insrtype				0.931257	0				Derived variables without documentation or base variables for question handling only	insrtype
insrtype2				0.974971	0				Derived variables without documentation or base variables for question handling only	Q1446. insrtype2
intro_ch				0.929025	0				Derived variables without documentation or base variables for question handling only	INTRO_CH. May I please speak with ______ ?
involve				0.425695	0.0430474				Derived variables without documentation or base variables for question handling only	involve
knowhist				0.0249119	0.0614963				Derived variables without documentation or base variables for question handling only	knowhist
limited				0.388288	0.00258519				Derived variables without documentation or base variables for question handling only	limited
ll1				0.250059	0.0163729				Derived variables without documentation or base variables for question handling only	LL1. Now thinking about your telephone use. Does anyone in your household, including yourself, have a working cell phone?
metro				0.931257	0.000822562				Derived variables without documentation or base variables for question handling only
nor_1a1				0.962241	0.000470035				Derived variables without documentation or base variables for question handling only	NOR-1_a1. You mentioned that you have a regular doctor you usually go to for medical help. Do you agree that The doctor takes me and my problems seriously
nor_1a2				0.962241	0.000587544				Derived variables without documentation or base variables for question handling only	NOR-1_a2. You mentioned that you have a regular doctor you usually go to for medical help. Do you agree that I have full confidence in the treatment the doctor gives
nor_1a3				0.962241	0.000665883				Derived variables without documentation or base variables for question handling only	NOR-1_a3. You mentioned that you have a regular doctor you usually go to for medical help. Do you agree that The doctor does not give me enough time
nor_1a4				0.962241	0.000861731				Derived variables without documentation or base variables for question handling only	NOR-1_a4. You mentioned that you have a regular doctor you usually go to for medical help. Do you agree that It takes way too much time to get an appointment with the doctor
nor_1a5				0.962241	0.00141011				Derived variables without documentation or base variables for question handling only	NOR-1_a5. You mentioned that you have a regular doctor you usually go to for medical help. Do you agree that I get referred to others if I need it
nswdbvar				0.870349	0				Derived variables without documentation or base variables for question handling only	NSW-DATABASED VARIABLE
numberofphones				1	0				Derived variables without documentation or base variables for question handling only	NUMBEROFPHONES
numdoc				0	0.0112025				Derived variables without documentation or base variables for question handling only	numdoc
numdoc2				0	0.0112025				Derived variables without documentation or base variables for question handling only	numdoc2
oopcosts				0	0.0882883				Derived variables without documentation or base variables for question handling only	oopcosts
oopcosts2				0	0.0882883				Derived variables without documentation or base variables for question handling only	oopcosts2
phoneproportion				0.929025	0				Derived variables without documentation or base variables for question handling only	Phoneproportion
ppl55hh				0	0.00246769				Derived variables without documentation or base variables for question handling only
q1030_1				0	0				Redudant variables or variables for interview processing	Q1030. After you were advised to see or decided to see a specialist how many days, weeks or months did you have to wait for an appointment?
q1030_2				0	0				Redudant variables or variables for interview processing	Q1030. After you were advised to see or decided to see a specialist how many days, weeks or months did you have to wait for an appointment?
q1030_3				0	0				Redudant variables or variables for interview processing	Q1030. After you were advised to see or decided to see a specialist how many days, weeks or months did you have to wait for an appointment?
q1030_4				0	0				Redudant variables or variables for interview processing	Q1030. After you were advised to see or decided to see a specialist how many days, weeks or months did you have to wait for an appointment?
q1030_5				0	0				Redudant variables or variables for interview processing	Q1030. After you were advised to see or decided to see a specialist how many days, weeks or months did you have to wait for an appointment?
q1030_6				0	0				Redudant variables or variables for interview processing	Q1030. After you were advised to see or decided to see a specialist how many days, weeks or months did you have to wait for an appointment?
q1030_7				0	0				Redudant variables or variables for interview processing	Q1030. After you were advised to see or decided to see a specialist how many days, weeks or months did you have to wait for an appointment?
q1030_8				0	0				Redudant variables or variables for interview processing	Q1030. After you were advised to see or decided to see a specialist how many days, weeks or months did you have to wait for an appointment?
q1030a1				0.902076	0.00097924				Redudant variables or variables for interview processing
q1030a2				0.783549	0.00274187				Redudant variables or variables for interview processing
q1030a3				0.8085	0.00246769				Redudant variables or variables for interview processing
q1030a4				0.991618	0.000156678				Redudant variables or variables for interview processing
q1494can2_6				0.793615	0				Country-specific variables	Q1494Can-2. Thinking of the most recent time you felt you needed help to provide this care but didn't receive it, was it because?	Other
q620h				0.793615	0				Country-specific variables	Q620. COMMUNITY SIZE
q625f				0.941246	0				Country-specific variables	Q625. AREA TYPE
q630f				0.941246	0.0137094				Country-specific variables	Q630. REGION (France)
q635h				0.931257	0				Country-specific variables	Q635. STATE
q710				0	0.00172346				Redudant variables or variables for interview processing	Q710. First, what is your year of birth?
q710a				0.927301	0				Derived variables without documentation or base variables for question handling only	Q710a. What is your age?
q730				0	0				Redudant variables or variables for interview processing	Q730. SCREENER QUALIFICATION IDENTIFICATION
qaccan1				0.793615	0.00411281				Derived variables without documentation or base variables for question handling only	QACCan-1. In planning for the future, have you considered the needs you may have when you are older, such as the need for supportive living, residential care or home care?
qaccan2				0.793615	0.0296514				Derived variables without documentation or base variables for question handling only	QACCan-2. How likely is it that you will require Supportive Living or Long Term Care in your lifetime?
qalhdsamp				0.893811	0				Derived variables without documentation or base variables for question handling only
qdz_ger				0.963651	0.000156678				Derived variables without documentation or base variables for question handling only	NA
qdz_neth				0.993498	0				Derived variables without documentation or base variables for question handling only	QDZ-NETH. What province do you live in ?
qdz_nor				0.984332	0				Derived variables without documentation or base variables for question handling only	QDZ-NOR. What COUNTY do you live in ?
qdz_swed				0.717744	0				Derived variables without documentation or base variables for question handling only	QDZ-SWED. What county do you live in?
qdz1				0.931257	0.00266353				Derived variables without documentation or base variables for question handling only	D-Z1. What is your zip code?
qdz1_chk				0.931257	0				Derived variables without documentation or base variables for question handling only	INTERVIEWER ONLY: Did respondent provide the following 5 digit zip code?
qdz4				0.929025	0				Derived variables without documentation or base variables for question handling only	D-Z4. What is your postal code?
qdz4_chk				0.929025	0				Derived variables without documentation or base variables for question handling only	INTERVIEWER ONLY: Did respondent provide the following 4 digit zip code?
qdza				0.870349	0.00152761				Derived variables without documentation or base variables for question handling only	D-ZA. What is your postal code?
qdza_chk				0.870349	0				Derived variables without documentation or base variables for question handling only	INTERVIEWER ONLY: Did respondent provide the following 4 digit zip code?
qdzar				0.979906	0.000195848				Derived variables without documentation or base variables for question handling only	D-ZAR. In which region are you living ?
qdzf				0.941246	0				Derived variables without documentation or base variables for question handling only	D-ZF. What is your postal code?
qdzf_chk				0.941246	0				Derived variables without documentation or base variables for question handling only	INTERVIEWER ONLY: Did respondent provide the following 5 digit zip code?
qdzwu				1	0				Derived variables without documentation or base variables for question handling only	D-ZSWU. Would you say your living area is ... ?
qger1				0.963651	0.00802977				Derived variables without documentation or base variables for question handling only	QGer-1. When you think about problems in the health care system, would you primarily see them
qger2				0.984881	0.000470035				Derived variables without documentation or base variables for question handling only	QGer-2. How often do you have someone help you read hospital materials?
qger3				0.963651	0.000900901				Derived variables without documentation or base variables for question handling only	QGer-3. How confident are you filling out medical forms by yourself?
qger4				0.963651	0.00144928				Derived variables without documentation or base variables for question handling only	QGer-4. How often do you have problems learning about your medical conditions because of difficulty understanding written information?
qger5				0.963651	0.00411281				Derived variables without documentation or base variables for question handling only	QGer-5. How easy or difficult is it for you to find out what healthcare services you are entitled to.
qlhdstrata				0.890325	0				Derived variables without documentation or base variables for question handling only	QLHD-STRATA
qn99				0	0				Redudant variables or variables for interview processing	Q99. QUALIFIED vs. NOT QUALIFIED
qswed1				0.730787	0.0335684				Derived variables without documentation or base variables for question handling only	QSWED1. Do you feel that the health center or clinic you usually go to prioritizes its economy before your needs?	Categories varied according countries
qswed10				0.865766	0.00250685				Derived variables without documentation or base variables for question handling only	QSWED10. Have any of these conversations contributed to you changing your habits regarding?
qswed11				0.865766	0.000900901				Derived variables without documentation or base variables for question handling only	QSWED11. Have you participated in any activity individually or in a group suggested by doctor or any clinical staff regarding diet, exercise, or stress?
qswed12				0.931453	0.00101841				Derived variables without documentation or base variables for question handling only	QSWED12. Do you need support from the municipality to be able to cope with your role as a family-care provider?
qswed13				0.990521	0.000117509				Derived variables without documentation or base variables for question handling only	QSWED13. Have you contacted the municipality to get support from them?
qswed2				0.730787	0.0140619				Derived variables without documentation or base variables for question handling only	QSWED2. Have you been you been forced to visit your health center for a 'health issue' that could have been treated at a single visit ?
qswed5				0.99291	0.000117509				Derived variables without documentation or base variables for question handling only	QSWED5. Besides the help you receive from your family and friends, do you also need help from the municipality?
qswed6				0.998942	3.91696e-05				Derived variables without documentation or base variables for question handling only	QSWED6. Have you contacted the municipality to get help from them?
qswed7a1				0.994908	0.000705053				Derived variables without documentation or base variables for question handling only	QSWED7a1. How important is it for you to be able to choose provider ?
qswed7a2				0.994908	0.000313357				Derived variables without documentation or base variables for question handling only	QSWED7a2. How important is it for you to be able to choose the personnel who will help you ?
qswed7a3				0.994908	0.000313357				Derived variables without documentation or base variables for question handling only	QSWED7a3. How important is it for you to be able to choose when you get your help during the day ?
qswed7a4				0.994908	0.000352526				Derived variables without documentation or base variables for question handling only	QSWED7a4. How important is it for you to be able to choose how the assistance is provided ?
qswed7a5				0.994908	0.000313357				Derived variables without documentation or base variables for question handling only	QSWED7a5. How important is it for you to be able to choose witch kind of assistance is provided ?
qswed8				0.80376	0.00317274				Derived variables without documentation or base variables for question handling only	QSWED8. How often do you receive recurrent treatment at the hospital for your chronic condition?
qswed9				0.865413	0.00963572				Derived variables without documentation or base variables for question handling only	QSWED9. If you had the right kind of professional support and education, would you be able to do similar treatment at home by yourself?
qswiss1				0.929025	0.00454367				Derived variables without documentation or base variables for question handling only	QSWISS1. Concerning medical basic care or treatment: could you imagine, to get a subsequent treatment by a specialised care professional instead of a doctor?
qswiss2a1				0.929025	0.00548374				Derived variables without documentation or base variables for question handling only	QSWISS2a1. Could you imagine, that in the near future, a pharmacist could provide the following care services, that up to now were provided principally by a doctor, such as Early detection and treatment of risk factors such as tobacco-consumpti...
qswiss2a2				0.929025	0.00148844				Derived variables without documentation or base variables for question handling only	QSWISS2a2. Could you imagine, that in the near future, a pharmacist could provide the following care services, that up to now were provided principally by a doctor, such as Routine monitoring e.g. for measuring blood pressure, cholesterol, blood...
qswiss2a3				0.929025	0.00231101				Derived variables without documentation or base variables for question handling only	QSWISS2a3. Could you imagine, that in the near future, a pharmacist could provide the following care services, that up to now were provided principally by a doctor, such as Wound care of minor injuries
qswiss2a4				0.929025	0.00336859				Derived variables without documentation or base variables for question handling only	QSWISS2a4. Could you imagine, that in the near future, a pharmacist could provide the following care services, that up to now were provided principally by a doctor, such as Vaccinations e.g. flu vaccination or travel vaccination
qswiss2a5				0.929025	0.00391696				Derived variables without documentation or base variables for question handling only	QSWISS2a5. Could you imagine, that in the near future, a pharmacist could provide the following care services, that up to now were provided principally by a doctor, such as Medication reviewing
qswiss2a6				0.929025	0.00242852				Derived variables without documentation or base variables for question handling only	QSWISS2a6. Could you imagine, that in the near future, a pharmacist could provide the following care services, that up to now were provided principally by a doctor, such as Diagnosis of simple diseases and their treatment without seeing a doctor...
qswiss3				0.929025	0.0149236				Derived variables without documentation or base variables for question handling only	QSWISS3. Imagine that there are different health care centres, where patient with chronic diseases would be treated. Assume you are a patient at one of these centers. How much has to decrease your basic premium, that you would accept such a limitation?
readmit				0.978261	0.000117509				Derived variables without documentation or base variables for question handling only	readmit
regdoc				0	0				Derived variables without documentation or base variables for question handling only	regdoc
rxreview				0.410067	0.00105758				Derived variables without documentation or base variables for question handling only	rxreview
rxuse				0	0.0104975				Derived variables without documentation or base variables for question handling only	rxuse
samenext				0	0.0861731				Derived variables without documentation or base variables for question handling only	samenext
samp10				0.724873	0				Derived variables without documentation or base variables for question handling only	ICR Match Code
samp12				0	0				Derived variables without documentation or base variables for question handling only	2000 CENSUS FIPS
samp15				0	0				Derived variables without documentation or base variables for question handling only	DMA
samp21				0.931257	0.0119076				Derived variables without documentation or base variables for question handling only	CENSUS DIVISION
sc2				0.421465	0.000548374				Derived variables without documentation or base variables for question handling only	SC2. And so that I can ask you the right questions, could you please tell me: Including yourself how many adults age 55 or older live in your household? N None _________ (1-5) 6 = 6 or more adults age 55 or older DD Don't know RR (...
sc2a				0.720995	0				Derived variables without documentation or base variables for question handling only	SC2a. May I please speak with the adult age 55 or older living in your household?
sc3a				0.706816	0				Derived variables without documentation or base variables for question handling only	SC3a. May I please speak with the younger/older of the two adults age 55 or older?
sc3b				0.993655	0				Derived variables without documentation or base variables for question handling only	SC3b. May I please speak with the adult age 55 or older who celebrated a birthday last/will celebrate a birthday next?
sc4				0.982491	0				Derived variables without documentation or base variables for question handling only	SC4. Good morning/ afternoon/ evening, my name is _______________. I am calling on behalf of _____________. We are conducting a worldwide study about healthcare issues. We are not selling anything.
sc4a				0.717744	0				Derived variables without documentation or base variables for question handling only	NA
speccoord				0.433764	0.0128476				Derived variables without documentation or base variables for question handling only	speccoord
specwait				0.425695	0.0189973				Derived variables without documentation or base variables for question handling only	specwait
spendtime				0.0249119	0.0331767				Derived variables without documentation or base variables for question handling only	spendtime
state				0	0				Derived variables without documentation or base variables for question handling only
trackinga				1	0				Derived variables without documentation or base variables for question handling only	TRACKINGa. Can you please tell me why __________ is not living (any longer) in your household?
trackingb				1	0				Derived variables without documentation or base variables for question handling only	TRACKINGb. Could you please tell me where __________ is living now and give me his/her current telephone number?
weight				0	0				Redudant variables or variables for interview processing	weight
yesrx				0	0.0104975				Derived variables without documentation or base variables for question handling only	yesrx
