# Supplementary material for: A network perspective of engaging patients in specialist and chronic illness care: The 2014 International Health Policy Survey
Source: PLOS journal article supplement (doi:10.1371/journal.pone.0201355), 2018-08-13
Supplement: S4 (10.1371/journal.pone.0201355.s004) [file journal.pone.0201355.s004]

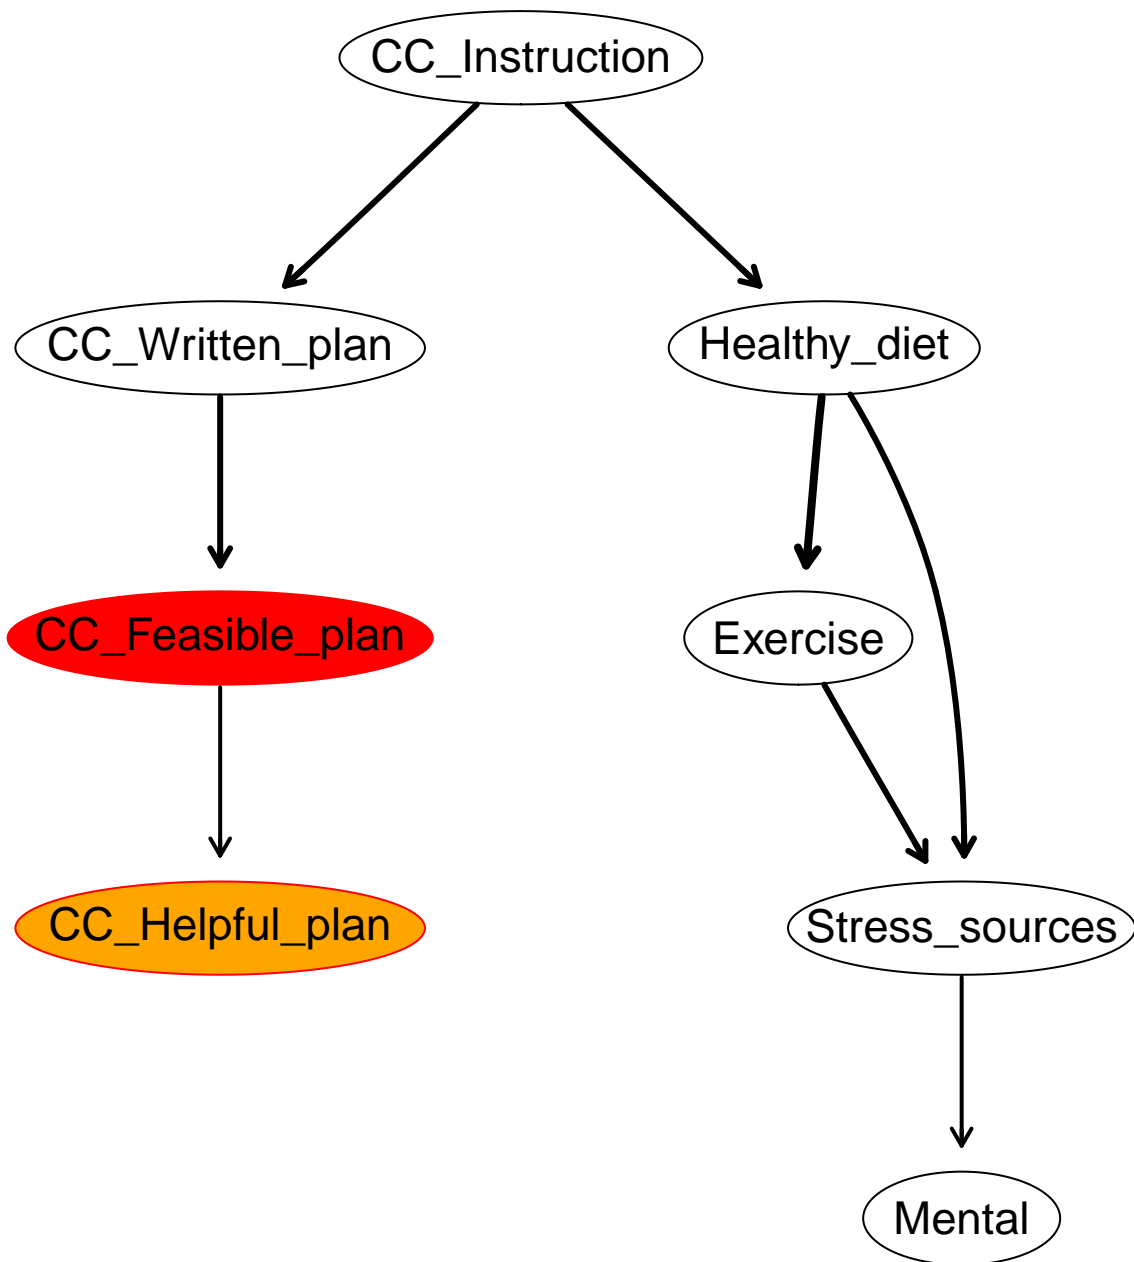

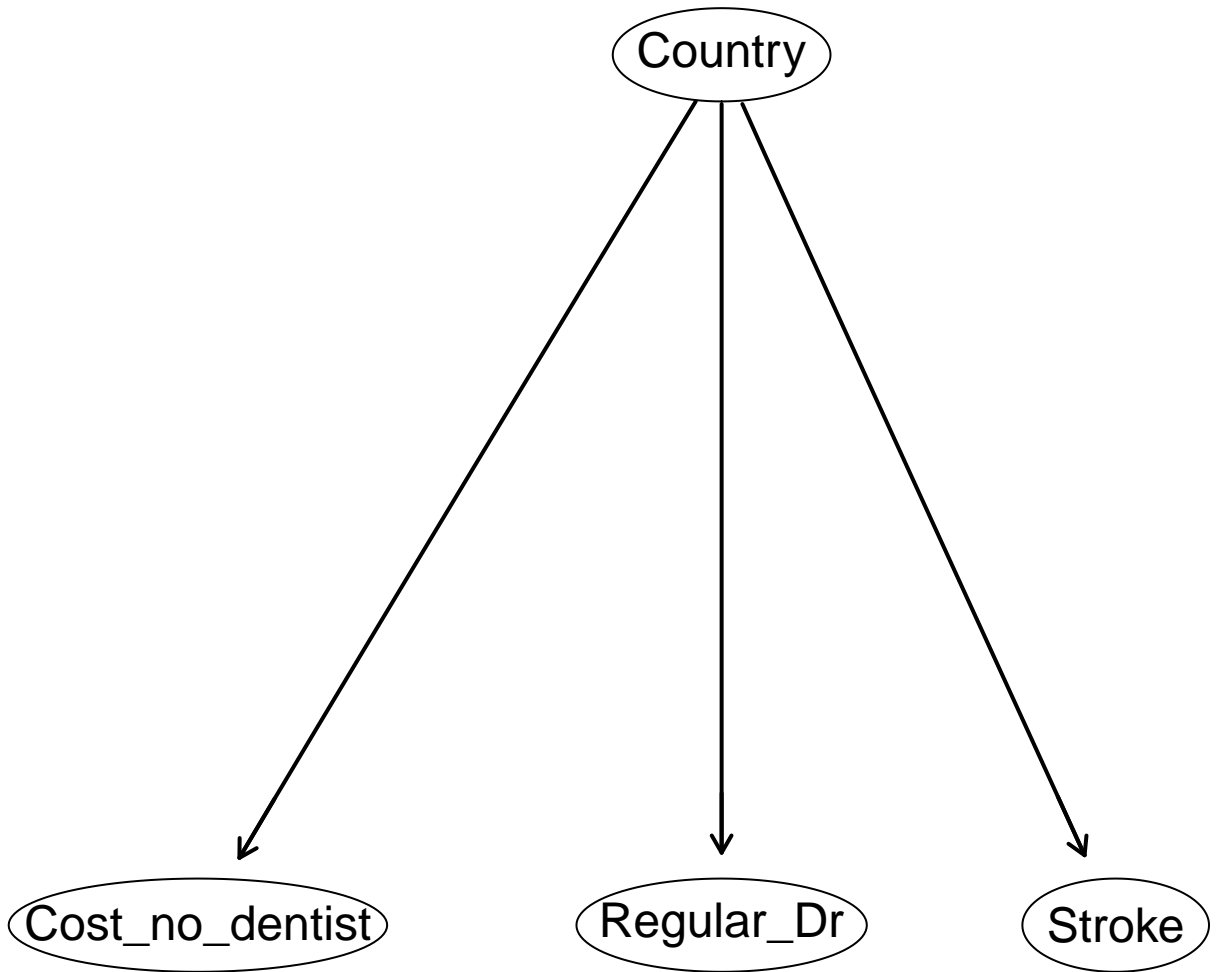

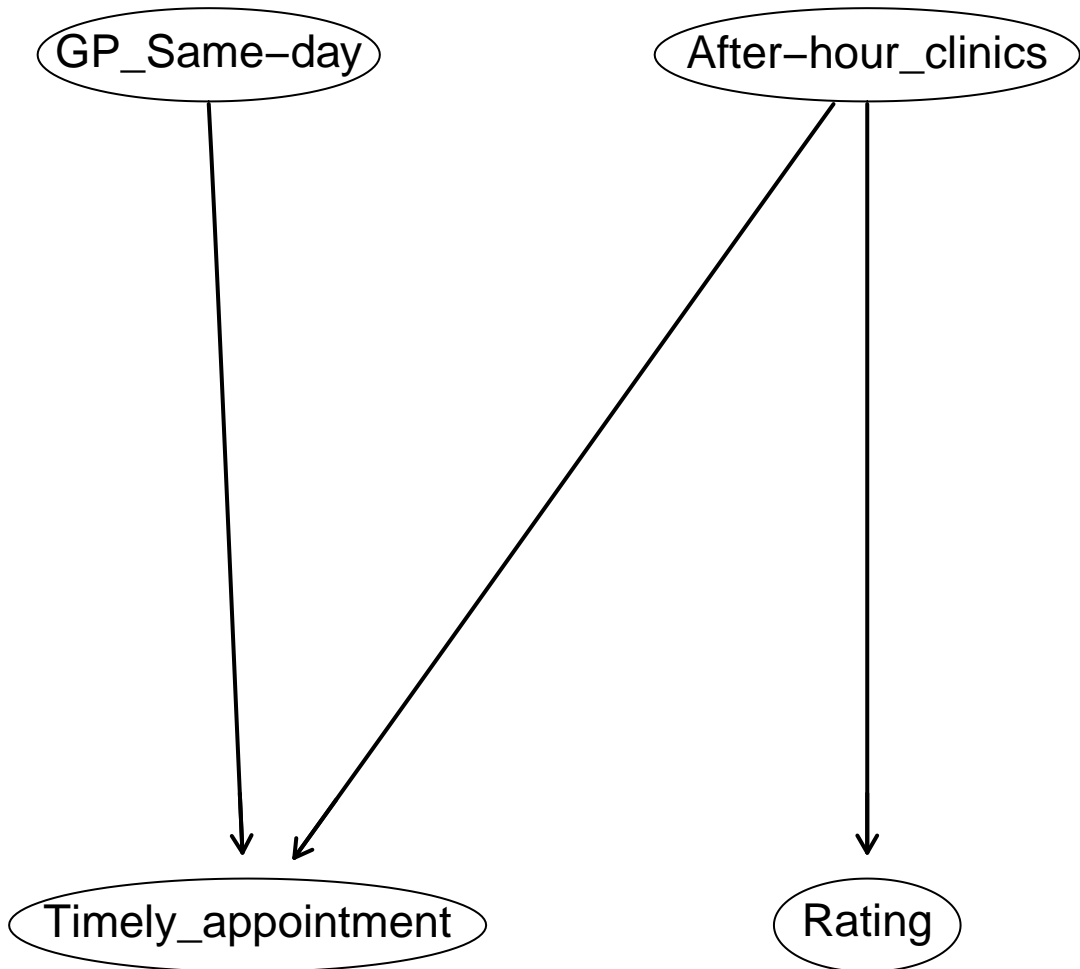

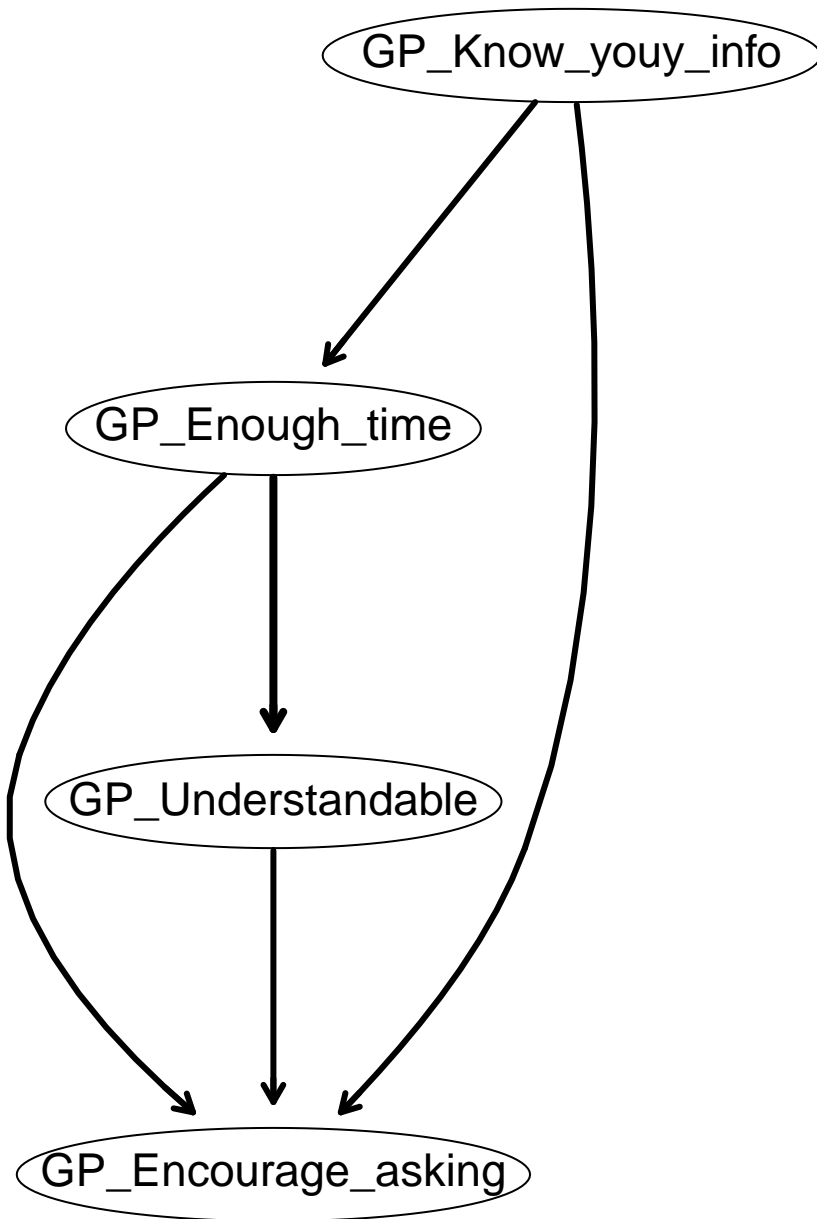

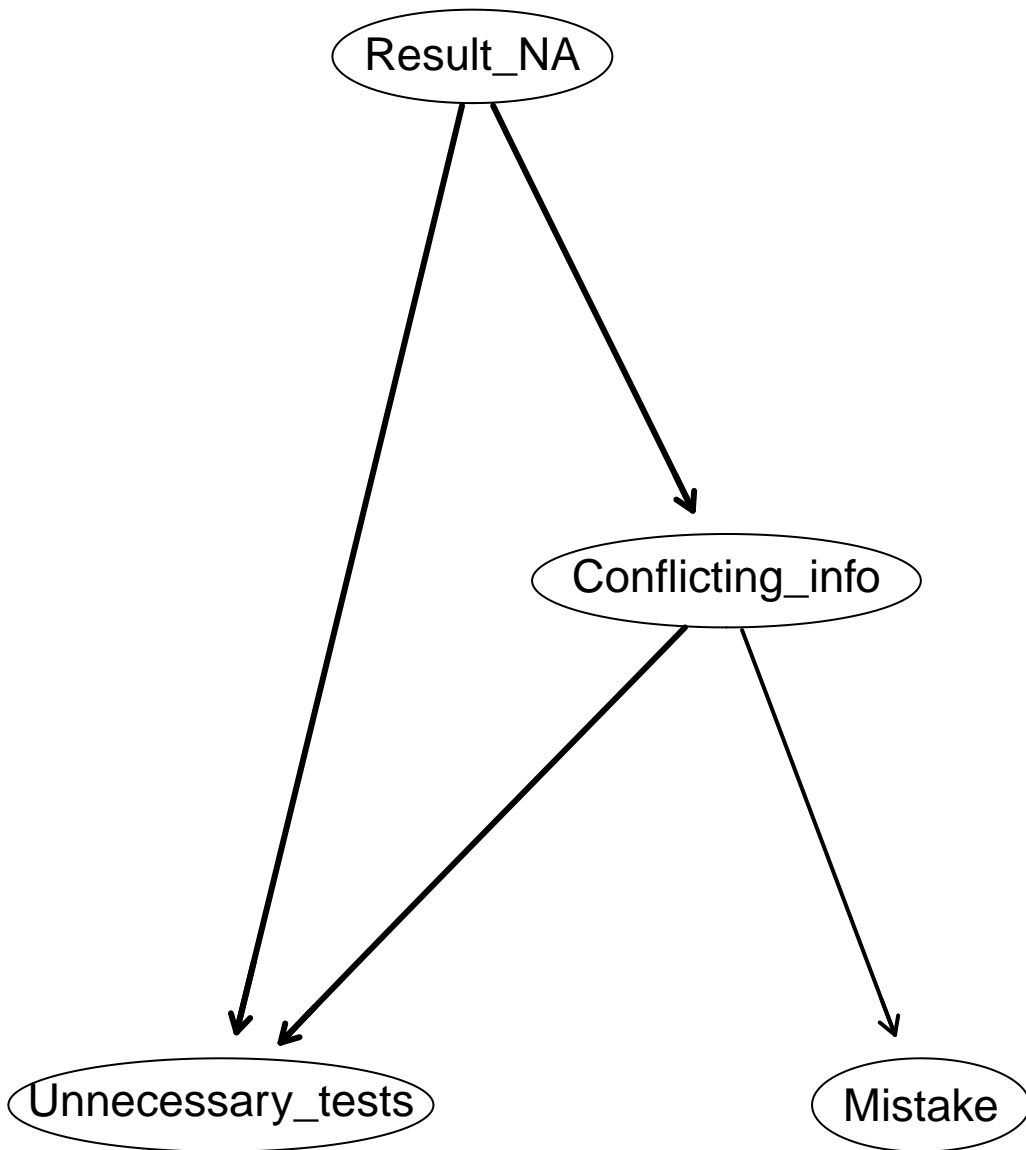

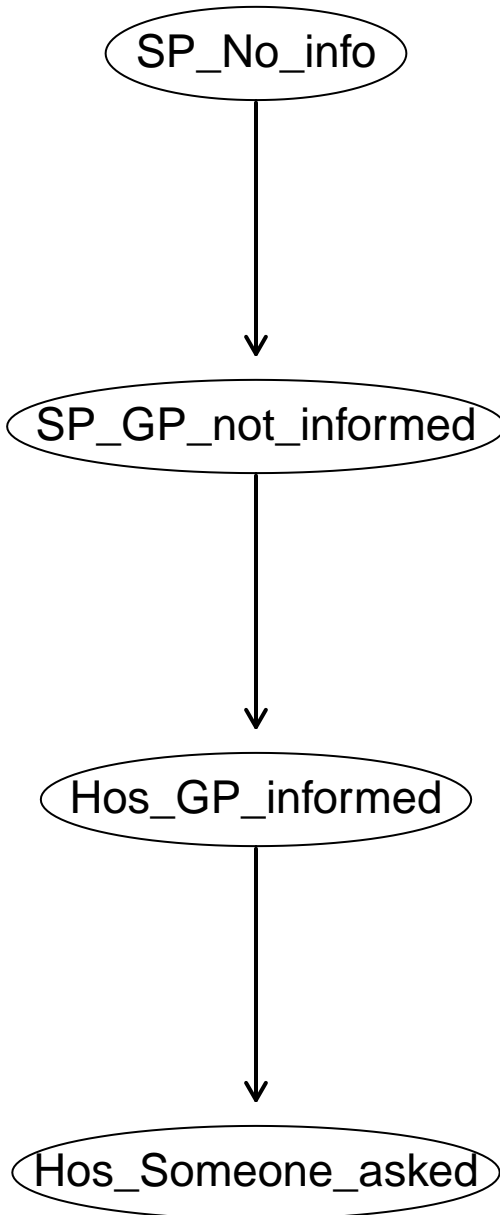

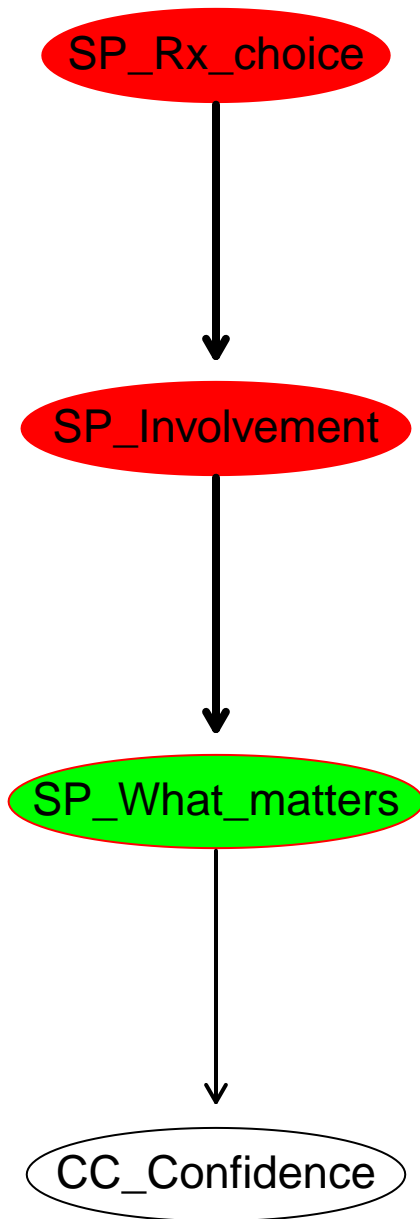

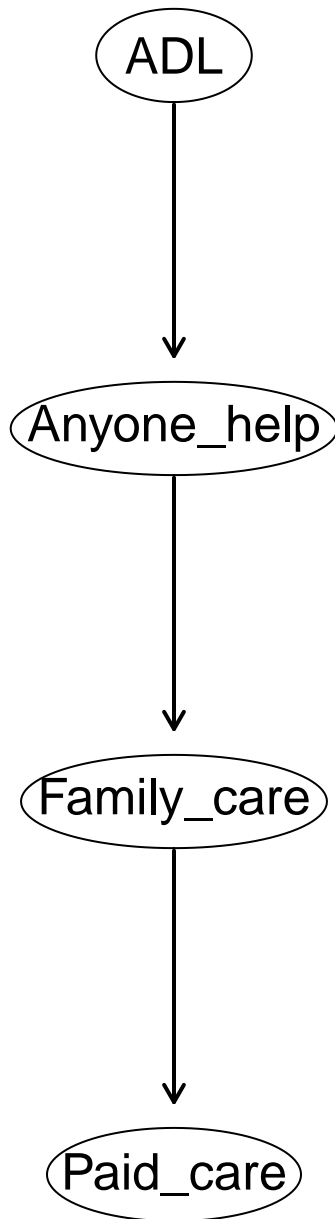



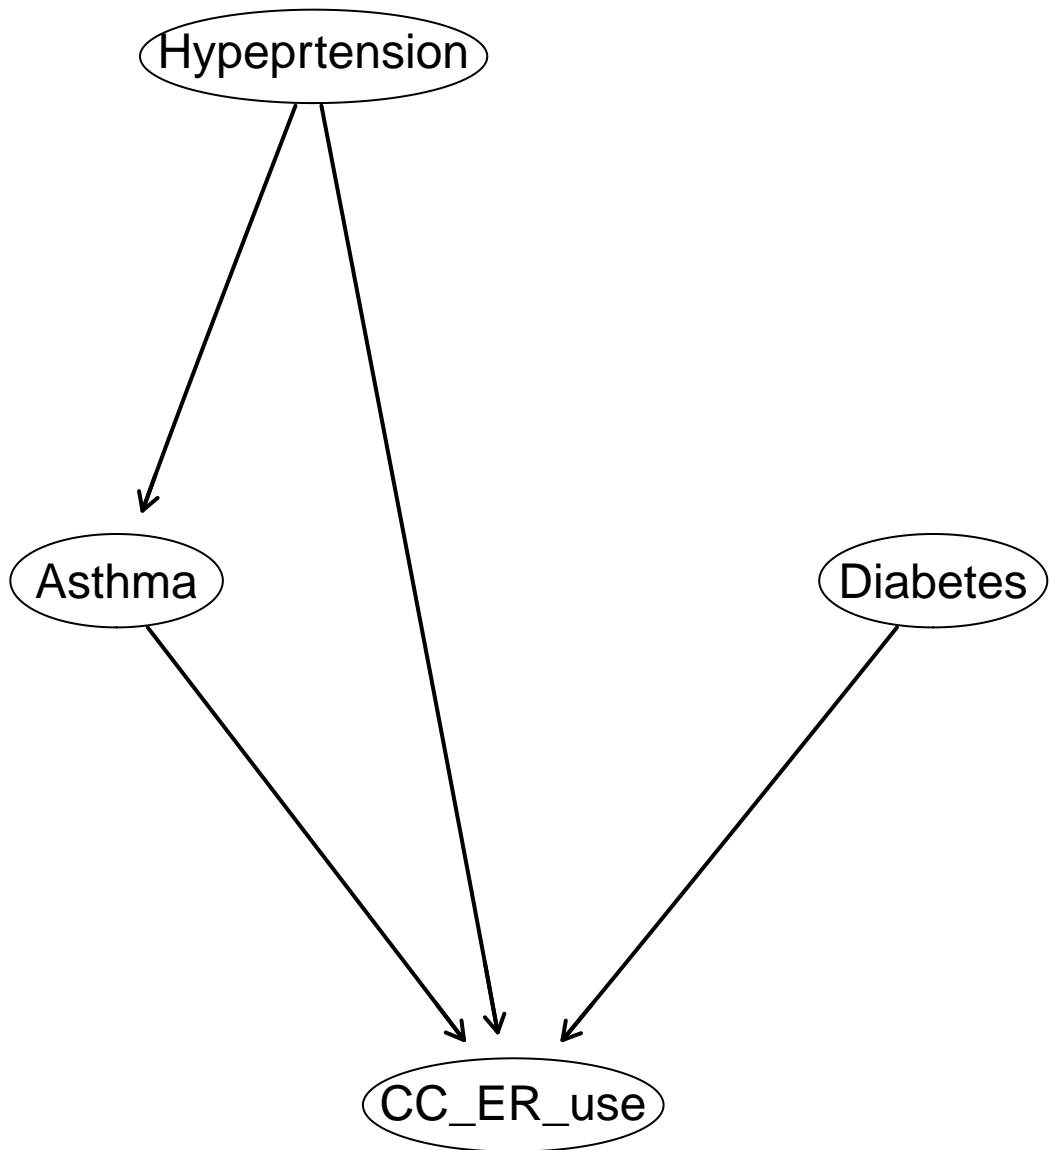

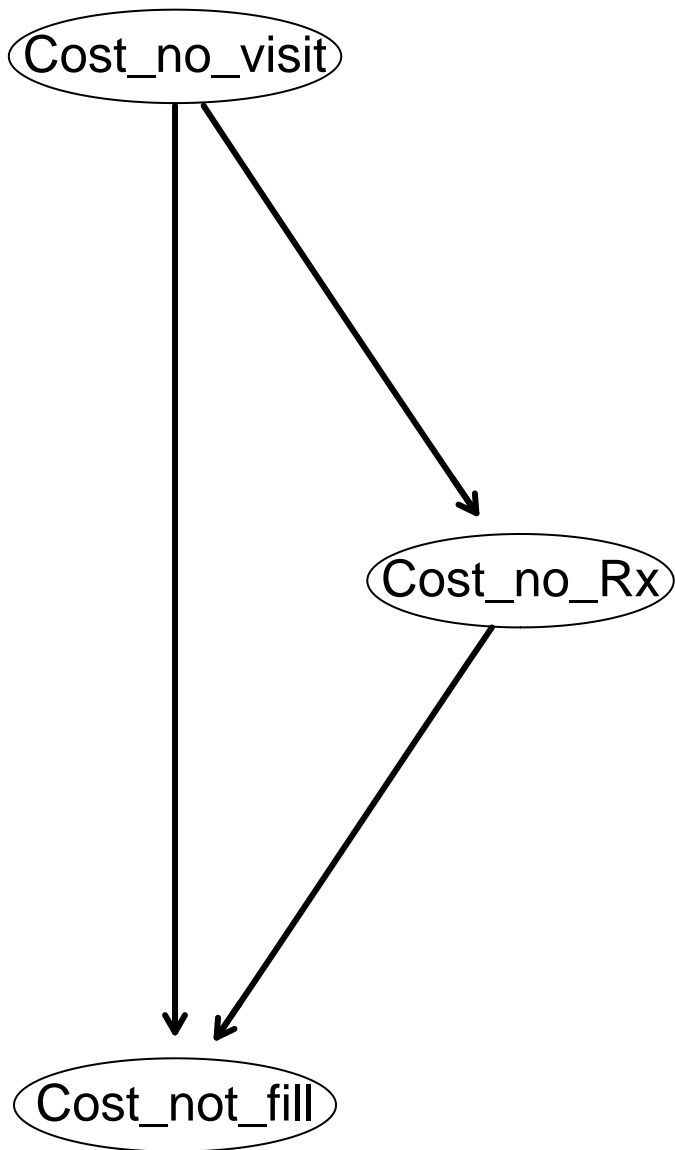

Review\_Rx

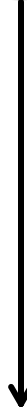

Explain\_Rx

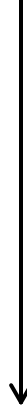

List\_Rx

Hos\_Written\_info

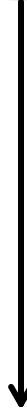

Hos\_Rx\_explained

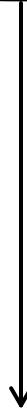

Hos\_FU\_made

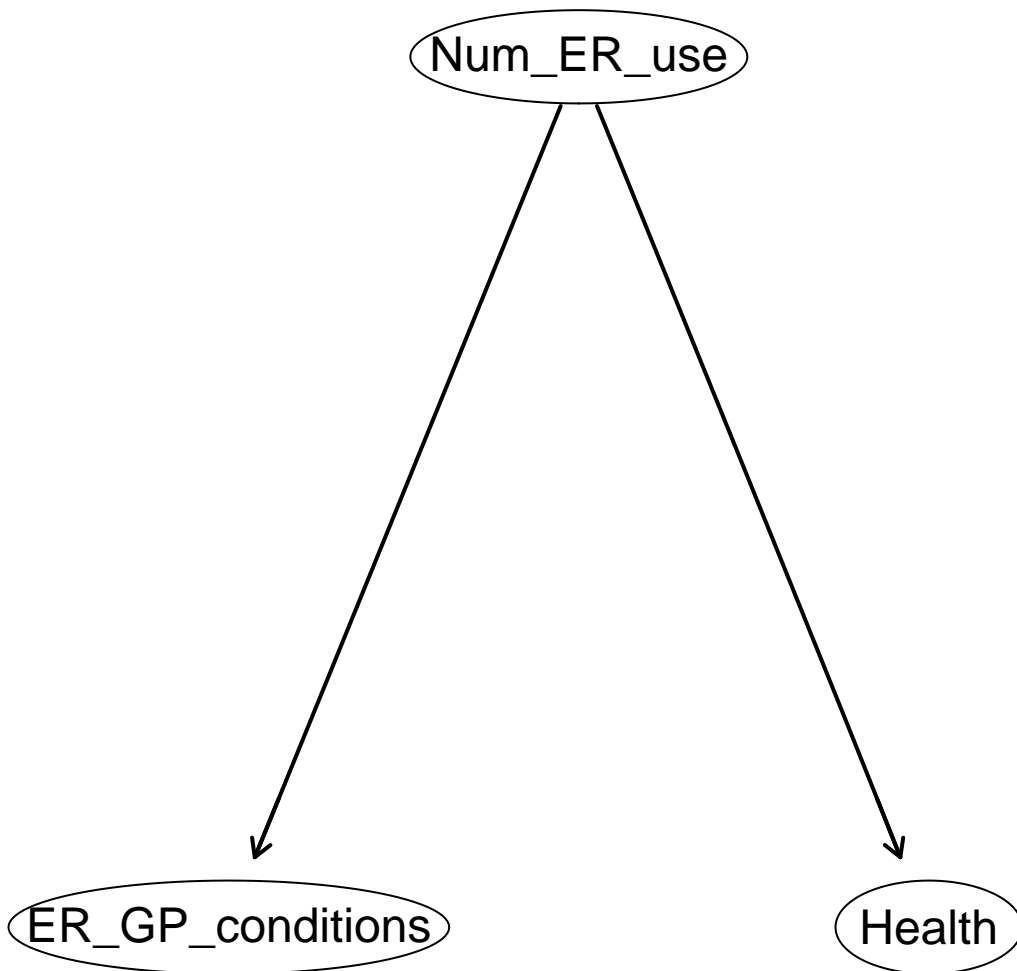

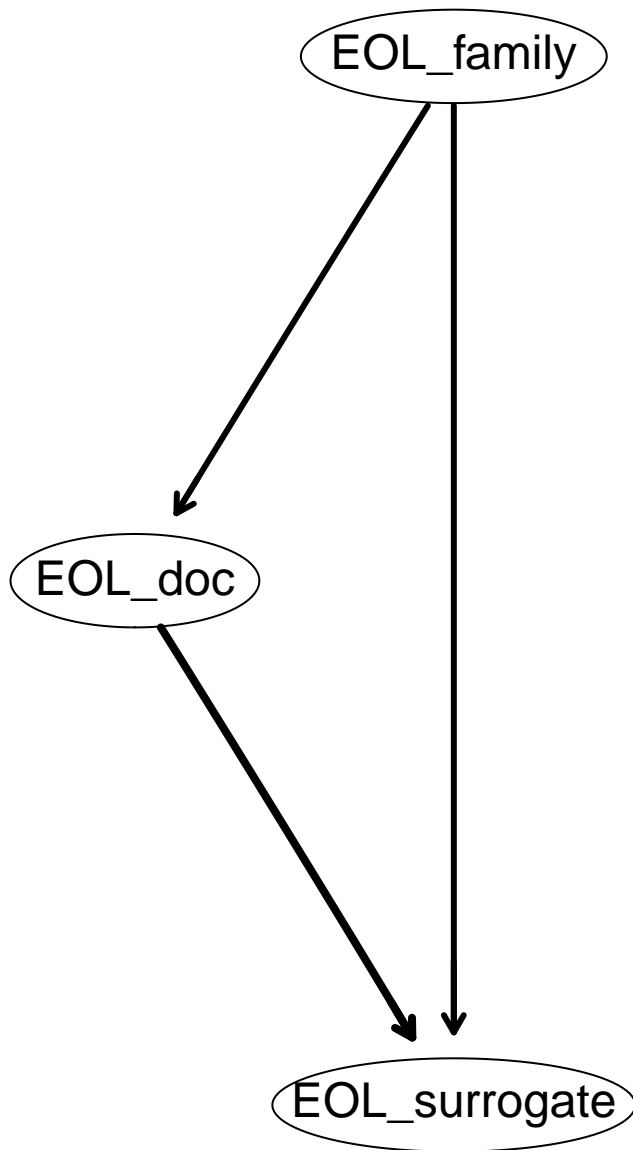

Uncertain\_dose

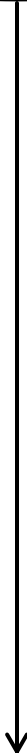

Hos\_Readmit

Cancer

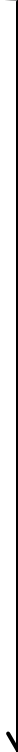

Joint\_pain



CC\_contacted

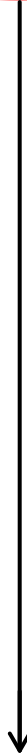

CC\_DR\_for\_question

Smoking

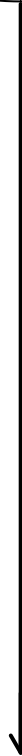

Dr\_quit

Family\_care

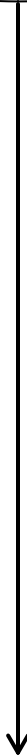

Time\_for\_care
